# Supplementary material for: WGS-Based Prediction and Analysis of Antimicrobial Resistance in Campylobacter jejuni Isolates From Israel
Source: Front Cell Infect Microbiol. 2020 Aug 13;10:365. doi: 10.3389/fcimb.2020.00365 (PMC7438411; doi:10.3389/fcimb.2020.00365)
Supplement: Supplementary Table 1 — List of isolates included in the study, metadata and sequence parameters. [file Table_1.XLSX]

## Sheet: Strain and sequence data
Strain name	MLST ST	MLST CC	Origin	year	Average read quality	Average read coverage	N50	No. contigs	Length
6	257	ST-257 complex	Poultry	2013	32	540	293691	8	1617105
5	257	ST-257 complex	Poultry	2013	32	253	293695	8	1617111
28	257	ST-257 complex	Poultry	2014	33	583	287274	9	1617203
140	257	ST-257 complex	Poultry	2014	32	600	332176	8	1651584
95023	257	ST-257 complex	Human - stool	2012	35	330	331136	7	1651696
75914	257	ST-257 complex	Human - stool	2010	35	303	324722	10	1679647
49861	257	ST-257 complex	Human - stool	2006	34	238	293762	9	1654320
49698	257	ST-257 complex	Human - stool	2006	35	297	293762	9	1654316
41354	257	ST-257 complex	Human - stool	2004	31	659	293759	9	1654797
54906	257	ST-257 complex	Human - stool	2007	33	203	331897	8	1693238
51385	257	ST-257 complex	Human - stool	2006	35	287	293759	10	1656449
42352	257	ST-257 complex	Human - stool	2004	32	662	293669	8	1609535
86850	257	ST-257 complex	Human - stool	2012	35	331	332983	12	1650077
43400	257	ST-257 complex	Human - stool	2004	34	257	295532	12	1662282
57428	257	ST-257 complex	Human - stool	2008	35	295	332987	9	1687504
56971	257	ST-257 complex	Human - stool	2008	34	217	332988	7	1650693
56623	257	ST-257 complex	Human - stool	2007	35	319	332987	8	1688087
56172	257	ST-257 complex	Human - stool	2007	35	620	332988	8	1650267
54988	257	ST-257 complex	Human - stool	2007	35	486	332990	12	1650077
49714	257	ST-257 complex	Human - stool	2006	35	508	332987	18	1699162
191p	257	ST-257 complex	Poultry	2008	35	271	332988	14	1725104
87566	257	ST-257 complex	Human - stool	2012	35	295	332988	12	1649934
86673	257	ST-257 complex	Human - stool	2011	35	338	332987	12	1650077
73287	257	ST-257 complex	Human - stool	2010	34	248	869159	8	1730677
169p	257	ST-257 complex	Poultry	2008	35	336	242655	21	1723922
60575	257	ST-257 complex	Human - stool	2008	35	258	242656	22	1724867
41254	257	ST-257 complex	Human - stool	2004	32	582	289204	14	1661504
60447	257	ST-257 complex	Human - stool	2008	34	270	287071	12	1614191
77544	257	ST-257 complex	Human - stool	2010	35	274	326747	12	1653888
77305	257	ST-257 complex	Human - stool	2010	35	248	333157	9	1653864
66320	257	ST-257 complex	Human - stool	2009	35	290	287138	10	1614144
70958	257	ST-257 complex	Human - stool	2010	35	273	333645	11	1692325
37046	572	ST-206 complex	Human - stool	2003	32	61	108785	39	1769899
54362	572	ST-206 complex	Human - stool	2007	32	66	56282	64	1676976
67215	572	ST-206 complex	Human - blood	2009	32	88	90615	32	1715503
45803	572	ST-206 complex	Human - stool	2005	32	64	37102	87	1712906
48945	572	ST-206 complex	Human - stool	2006	32	73	24637	120	1756660
62686	572	ST-206 complex	Human - stool	2008	32	78	51319	58	1715959
76636	572	ST-206 complex	Human - stool	2010	32	81	98740	40	1641654
41988	572	ST-206 complex	Human - stool	2004	33	64	53207	57	1642716
77569	572	ST-206 complex	Human - stool	2010	32	79	71105	49	1646192
63874	572	ST-206 complex	Human - stool	2009	33	86	98328	35	1647625
57254	572	ST-206 complex	Human - stool	2008	32	82	62587	43	1646797
48756	572	ST-206 complex	Human - stool	2006	33	71	56037	50	1640611
35992	572	ST-206 complex	Human - stool	2003	32	65	42260	82	1715718
56974	572	ST-206 complex	Human - stool	2008	32	64	44467	86	1727670
52046	572	ST-206 complex	Human - stool	2006	32	68	59025	58	1644227
78c	572	ST-206 complex	Bovine	2008	32	387	153502	18	1727129
45c	572	ST-206 complex	Bovine	2008	33	90	89858	37	1644038
62690	572	ST-206 complex	Human - stool	2008	32	87	63737	54	1648745
56547	572	ST-206 complex	Human - stool	2007	32	92	53350	57	1649804
67005	572	ST-206 complex	Human - stool	2009	32	76	111987	35	1650281
64436	572	ST-206 complex	Human - stool	2009	32	57	63666	59	1650449
60230	572	ST-206 complex	Human - stool	2008	32	81	28550	93	1689574
56	572	ST-206 complex	Poultry	2014	32	74	197900	32	1651210
35872	7547	ST-48 complex	Human - stool	2003	36	376	191392	14	1643335
57129	50	ST-21 complex	Human - stool	2008	34	279	332764	17	1663724
44206	50	ST-21 complex	Human - stool	2004	35	332	1031976	12	1625121
43912	50	ST-21 complex	Human - stool	2004	35	349	294214	15	1662195
45214	50	ST-21 complex	Human - stool	2005	33	293	294214	15	1662171
42353	50	ST-21 complex	Human - stool	2004	35	257	294216	17	1664613
87116	50	ST-21 complex	Human - stool	2012	35	424	1026943	14	1630797
42782	50	ST-21 complex	Human - stool	2004	35	345	332375	15	1662971
79401	50	ST-21 complex	Human - stool	2011	34	548	294448	24	1625004
56957	50	ST-21 complex	Human - stool	2008	34	238	197929	18	1663083
56986	50	ST-21 complex	Human - stool	2008	35	329	294215	15	1663057
75417	50	ST-21 complex	Human - stool	2010	35	445	1020110	23	1627581
43197	50	ST-21 complex	Human - stool	2004	35	321	159540	22	1620905
38558	50	ST-21 complex	Human - blood	2003	35	265	159541	28	1667014
44837	50	ST-21 complex	Human - stool	2005	35	306	159540	32	1686076
44845	50	ST-21 complex	Human - stool	2005	35	346	159539	22	1624166
42548	50	ST-21 complex	Human - stool	2004	35	249	188295	17	1698688
70421	50	ST-21 complex	Human - stool	2010	34	393	159540	33	1694389
45911	50	ST-21 complex	Human - stool	2005	35	384	188347	22	1656909
55519	50	ST-21 complex	Human - stool	2007	35	323	159541	18	1630026
37059	6978	ST-21 complex	Human - stool	2003	36	110	175798	27	1737565
35986	6627	ST-21 complex	Human - stool	2003	36	135	295459	12	1672609
72450	883	ST-21 complex	Human - stool	2010	36	254	295434	9	1626476
35998	883	ST-21 complex	Human - stool	2003	37	356	217014	41	1873616
77938	883	ST-21 complex	Human - stool	2011	36	209	295574	11	1656577
77734	883	ST-21 complex	Human - stool	2010	36	284	295529	13	1657876
57111	883	ST-21 complex	Human - stool	2008	36	285	295479	8	1666078
41150	883	ST-21 complex	Human - stool	2004	36	209	154624	77	1653616
60661	883	ST-21 complex	Human - stool	2008	37	313	399955	77	1692357
64289	883	ST-21 complex	Human - stool	2009	36	220	295495	12	1626741
77409	883	ST-21 complex	Human - stool	2010	36	238	222398	42	1638480
42001	883	ST-21 complex	Human - stool	2004	36	345	295479	9	1627665
67588	883	ST-21 complex	Human - stool	2009	37	316	295387	27	1705279
76564	883	ST-21 complex	Human - stool	2010	36	296	1028070	12	1631256
76262	883	ST-21 complex	Human - stool	2010	37	274	219354	75	1653499
75686	883	ST-21 complex	Human - stool	2010	36	201	223027	17	1704268
41471	883	ST-21 complex	Human - stool	2004	37	350	228631	57	1645312
151	883	ST-21 complex	Poultry	2014	36	217	366268	33	1643086
95201	52	ST-52 complex	Human - blood	2012	36	213	211194	18	1643992
46108	52	ST-52 complex	Human - stool	2005	37	88	181537	27	1605217
37123	52	ST-52 complex	Human - blood	2003	37	440	336608	42	1691764
43019	52	ST-52 complex	Human - stool	2004	36	112	107907	43	1612939
49205	49	ST-49 complex	Human - stool	2006	37	294	238236	17	1619173
43020	49	ST-49 complex	Human - stool	2004	36	230	194512	23	1657075
54567	49	ST-49 complex	Human - blood	2007	37	219	239578	14	1618389
59449	49	ST-49 complex	Human - blood	2008	37	204	180238	16	1656118
57644	49	ST-49 complex	Human - blood	2008	37	201	240099	14	1655343
49427	6565	Unassigned	Human - stool	2006	36	252	99265	91	1728140
47784	6565	Unassigned	Human - stool	2005	36	286	146546	71	1724388
76973	6565	Unassigned	Human - blood	2010	37	298	162624	23	1704627
49472	6695	Unassigned	Human - stool	2006	37	423	187256	17	1632567
48630	6695	Unassigned	Human - stool	2006	36	291	105066	164	1685644
76957	400	ST-353 complex	Human - blood	2010	36	222	287232	32	1740262
49369	400	ST-353 complex	Human - stool	2006	36	264	104698	790	2156620
93695	400	ST-353 complex	Human - blood	2012	37	217	243620	30	1744125
69598	6608	ST-21 complex	Human - blood	2009	37	232	174605	23	1709104
49727	6608	ST-21 complex	Human - stool	2006	36	305	189597	18	1672248
55134	6608	ST-21 complex	Human - blood	2007	36	269	189597	34	1737103
55764	6608	ST-21 complex	Human - blood	2007	37	215	189598	17	1671467
61601	50	ST-21 complex	Human - blood	2008	35	338	226080	19	1667118
49626	50	ST-21 complex	Human - stool	2006	32	552	226042	21	1667133
49957	50	ST-21 complex	Human - stool	2006	35	407	226042	21	1667350
43379	50	ST-21 complex	Human - stool	2004	35	471	154047	45	1695442
48617	6566	ST-42 complex	Human - stool	2006	36	172	212585	12	1676091
45955	6566	ST-42 complex	Human - stool	2005	36	250	224834	12	1673837
78023	6566	ST-42 complex	Human - blood	2011	37	250	186711	14	1673501
75443	6566	ST-42 complex	Human - blood	2010	37	232	212564	17	1682511
87698	2337	ST-353 complex	Human - blood	2012	37	272	183525	27	1792151
74087	2337	ST-353 complex	Human - blood	2010	38	146	227594	42	1783473
52104	1359	ST-21 complex	Human - stool	2006	34	310	221569	14	1754553
48511	1359	ST-21 complex	Human - stool	2006	35	341	188275	22	1733038
50047	1359	ST-21 complex	Human - stool	2006	34	297	188277	21	1733961
52105	1359	ST-21 complex	Human - stool	2006	35	299	221569	18	1754403
49563	1359	ST-21 complex	Human - stool	2006	35	307	188275	18	1734510
43803	1359	ST-21 complex	Human - stool	2004	33	239	189175	22	1770772
45882	1359	ST-21 complex	Human - stool	2005	34	260	188274	32	1791582
43665	1359	ST-21 complex	Human - stool	2004	35	274	188275	61	1814215
50446	1359	ST-21 complex	Human - stool	2006	34	425	188276	15	1676160
56969	1359	ST-21 complex	Human - stool	2008	35	284	188275	18	1747088
90475	1359	ST-21 complex	Human - stool	2012	35	255	177072	36	1848241
52441	1359	ST-21 complex	Human - stool	2007	35	403	188310	17	1808166
54574	50	ST-21 complex	Human - stool	2007	35	372	154057	28	1695496
49264	50	ST-21 complex	Human - stool	2006	35	313	154025	27	1752640
92157	572	ST-206 complex	Human - stool	2012	32	66	134116	21	1680395
92306	572	ST-206 complex	Human - stool	2012	32	79	34436	87	1676188
79551	572	ST-206 complex	Human - stool	2011	32	59	75402	37	1679602
78555	572	ST-206 complex	Human - stool	2011	33	78	84468	42	1679610
79390	572	ST-206 complex	Human - stool	2011	32	65	41610	68	1642967
72945	572	ST-206 complex	Human - stool	2010	33	77	65691	43	1644146
79685	572	ST-206 complex	Human - stool	2011	30	71	68775	51	1639590
40	572	ST-206 complex	Poultry	2014	32	561	191332	16	1641898
36	572	ST-206 complex	Poultry	2014	32	75	62737	100	1683662
93196	572	ST-206 complex	Human - stool	2012	32	68	90256	43	1647092
89880	572	ST-206 complex	Human - stool	2012	32	54	96883	52	1651479
56972	572	ST-206 complex	Human - stool	2008	33	90	51559	73	1643969
41197	572	ST-206 complex	Human - stool	2004	32	58	29904	130	1831069
189	21	ST-21 complex	Poultry	2008	36	186	176346	15	1705997
29	21	ST-21 complex	Poultry	2014	36	233	176346	15	1704225
91626	21	ST-21 complex	Human - blood	2012	36	263	189507	37	1716065
77627	21	ST-21 complex	Human - stool	2010	36	275	189508	19	1708032
51955	21	ST-21 complex	Human - stool	2006	37	286	189507	17	1706159
208p	21	ST-21 complex	Poultry	2008	36	234	176346	276	1870089
56786	21	ST-21 complex	Human - stool	2008	36	306	227540	15	1734177
60663	21	ST-21 complex	Human - stool	2008	36	207	227773	19	1744462
67651	21	ST-21 complex	Human - stool	2009	37	235	176346	20	1706523
72503	21	ST-21 complex	Human - stool	2010	36	447	176346	21	1706294
52041	21	ST-21 complex	Human - stool	2006	36	316	189507	21	1708027
9c	21	ST-21 complex	Bovine	2008	37	309	135191	34	1707558
68a	50	ST-21 complex	Poultry	2014	34	319	189570	14	1718151
90249	50	ST-21 complex	Human - stool	2012	35	319	189570	11	1713280
68237	50	ST-21 complex	Human - blood	2009	35	391	189571	11	1713343
60441	50	ST-21 complex	Human - stool	2008	35	436	261818	13	1712110
57769	50	ST-21 complex	Human - stool	2008	31	558	199398	17	1751479
43962	50	ST-21 complex	Human - stool	2004	34	217	226045	14	1669862
44423	50	ST-21 complex	Human - stool	2005	34	264	875559	11	1714399
50288	50	ST-21 complex	Human - stool	2006	35	450	269854	20	1713300
47753	460	ST-460 complex	Human - blood	2005	36	331	157594	96	1782741
48594	460	ST-460 complex	Human - stool	2006	37	345	175566	70	1770157
48778	460	ST-460 complex	Human - stool	2006	36	161	89311	89	1809292
49361	460	ST-460 complex	Human - stool	2006	36	314	301187	47	1772762
69130	460	ST-460 complex	Human - blood	2009	37	105	148937	52	1800622
210p	1359	ST-21 complex	Poultry	2008	34	263	188276	25	1794559
211p	1359	ST-21 complex	Poultry	2008	35	326	188276	28	1794386
53818	1359	ST-21 complex	Human - stool	2007	35	376	188279	30	1792114
56981	1359	ST-21 complex	Human - stool	2008	35	257	189323	25	1790921
67219	1359	ST-21 complex	Human - stool	2009	35	279	188277	18	1791022
50400	1359	ST-21 complex	Human - stool	2006	35	459	188276	18	1785426
44153	1359	ST-21 complex	Human - stool	2004	34	222	188276	38	1796454
54927	1359	ST-21 complex	Human - stool	2007	35	343	150135	28	1779356
52608	1359	ST-21 complex	Human - stool	2007	34	307	150135	21	1777431
87217	4766	Unassigned	Human - blood	2012	36	231	161836	22	1831214
75465	4766	Unassigned	Human - blood	2010	37	305	161836	24	1862534
77138	137	ST-45 complex	Human - blood	2010	37	147	184559	27	1644619
73241	137	ST-45 complex	Human - blood	2010	37	245	184244	16	1645566
83224	137	ST-45 complex	Human - blood	2011	37	231	234518	14	1604450
88808	4057	ST-574 complex	Human - stool	2012	37	287	125298	46	1730075
83986	4057	ST-574 complex	Human - stool	2011	36	211	225986	16	1749019
73110	4057	ST-574 complex	Human - stool	2010	36	281	225986	13	1685850
95p	4057	ST-574 complex	Poultry	2008	37	267	149708	28	1720285
119p	4057	ST-574 complex	Poultry	2008	36	268	151598	59	1737856
67665	4057	ST-574 complex	Human - stool	2009	37	297	176074	18	1686653
69853	4057	ST-574 complex	Human - blood	2009	36	359	225987	13	1686637
47845	4057	ST-574 complex	Human - stool	2005	36	203	154586	24	1722302
54379	4057	ST-574 complex	Human - stool	2007	37	428	176075	17	1685761
52737	4057	ST-574 complex	Human - stool	2007	36	280	225987	15	1686742
37086	4057	ST-574 complex	Human - stool	2003	36	240	186665	37	1695324
67702	4057	ST-574 complex	Human - stool	2009	36	365	225986	14	1685888
72050	4057	ST-574 complex	Human - stool	2010	36	333	225985	18	1724761
75710	4057	ST-574 complex	Human - stool	2010	36	302	128624	24	1722477
38482	4057	ST-574 complex	Human - stool	2003	36	202	113204	50	1768871
88796	4057	ST-574 complex	Human - stool	2012	37	288	251932	37	1742346
9lul	4057	ST-574 complex	Poultry	2015	37	275	145278	21	1720588
48593	400	ST-353 complex	Human - stool	2006	36	226	176392	41	1770649
48396	400	ST-353 complex	Human - stool	2006	36	286	183199	34	1741190
73257	50	ST-21 complex	Human - blood	2010	34	557	354067	24	1634730
87629	50	ST-21 complex	Human - stool	2012	35	334	159979	24	1630357
67799	50	ST-21 complex	Human - stool	2009	35	344	159979	22	1633304
67999	50	ST-21 complex	Human - stool	2009	35	387	159970	24	1633556
39250	42	ST-42 complex	Human - blood	2003	37	314	187283	21	1630992
38345	42	ST-42 complex	Human - stool	2003	37	293	186579	90	1710504
50096	21	ST-21 complex	Human - stool	2006	37	321	189522	21	1639859
52691	21	ST-21 complex	Human - stool	2007	36	282	189523	22	1642025
51319	21	ST-21 complex	Human - stool	2006	36	264	189523	18	1638367
57740	21	ST-21 complex	Human - stool	2008	36	206	189525	16	1639298
49908	21	ST-21 complex	Human - stool	2006	37	322	175605	25	1639446
47554	354	ST-354 complex	Human - blood	2005	36	329	355199	96	1742627
43841	354	ST-354 complex	Human - stool	2004	36	225	379987	17	1706917
49689	354	ST-354 complex	Human - stool	2006	36	336	451913	13	1705969
85125	49	ST-49 complex	Human - blood	2011	37	210	211324	17	1645592
93312	49	ST-49 complex	Human - blood	2012	36	189	229298	15	1690118
89373	49	ST-49 complex	Human - blood	2012	37	234	229293	13	1689937
74923	49	ST-49 complex	Human - blood	2010	36	216	228087	14	1644064
93225	7400	Unassigned	Human - blood	2012	37	225	243468	64	1800641
86758	7450	ST-42 complex	Human - blood	2012	37	199	213079	16	1669922
86664	50	ST-21 complex	Human - stool	2012	34	410	255512	21	1728303
78761	257	ST-257 complex	Human - stool	2011	35	255	333040	12	1698218
60665	50	ST-21 complex	Human - stool	2008	35	355	188296	34	1697338
31b	50	ST-21 complex	Poultry	2014	35	325	446012	20	1679431
73629	1751	ST-42 complex	Human - blood	2010	37	245	220393	24	1684505
69948	122	ST-206 complex	Human - blood	2009	37	249	161847	19	1647011
67803	658	ST-658 complex	Human - blood	2009	37	228	323067	16	1660873
54898	467	ST-49 complex	Human - blood	2007	37	353	289412	10	1623942
50118	696	ST-1332 complex	Human - blood	2006	37	302	306691	14	1612972
47478	2122	ST-353 complex	Human - blood	2005	37	322	174526	28	1819342
43543	19	ST-21 complex	Human - blood	2004	37	251	154055	30	1617249
40023	5	ST-353 complex	Human - blood	2003	37	249	286394	23	1691049
37627	5794	ST-443 complex	Human - blood	2003	37	210	293803	19	1640804
38194	572	ST-206 complex	Human - stool	2003	32	61	39249	87	1682349
94	50	ST-21 complex	Poultry	2014	35	262	154047	23	1628250
77014	21	ST-21 complex	Human - stool	2010	37	444	180419	23	1803186
49467	468	Unassigned	Human - stool	2006	36	582	144428	41	1634634
49329	51	ST-443 complex	Human - blood	2006	36	254	94826	40	1687706
48795	6977	ST-446 complex	Human - stool	2006	36	286	144137	35	1726156
48779	1474	ST-353 complex	Human - stool	2006	37	330	121541	70	1731661
47573	2927	ST-607 complex	Human - stool	2005	36	277	213044	124	1832958
47468	353	ST-353 complex	Human - blood	2005	37	309	317705	15	1704280
47379	1962	Unassigned	Human - stool	2005	36	243	207044	20	1680461
47263	6874	Unassigned	Human - stool	2005	36	245	169969	70	1860974
45737	6713	ST-353 complex	Human - stool	2005	36	283	565009	24	1712173
45601	607	ST-607 complex	Human - blood	2005	36	300	137120	106	1804969
44529	881	Unassigned	Human - stool	2005	36	351	261459	54	1714108
43431	905	Unassigned	Human - stool	2004	36	213	276020	36	1597559
42948	508	ST-508 complex	Human - blood	2004	36	195	173471	91	1754984
42802	3269	ST-446 complex	Human - stool	2004	37	380	176618	39	1731508
42276	122	ST-206 complex	Human - stool	2004	36	299	106652	86	1715606
42230	190	ST-21 complex	Human - stool	2004	36	283	218830	58	1720284
41523	5285	ST-607 complex	Human - stool	2004	36	215	183789	175	1909549
39123	1923	ST-257 complex	Human - blood	2003	36	183	178437	31	1781934
